# Supplementary material for: The combined effects of genetic variation in the SIRT1 gene and dietary intake of n-3 and n-6 polyunsaturated fatty acids on serum LDL-C and HDL-C levels: a population based study
Source: PubMed Central journal article supplement (PMC3554548; doi:10.1186/1476-511x-12-4), 2013-01-11
Supplement: 1476-511X-12-4-S1.pdf [file 1476-511X-12-4-S1.pdf]

Additional Table1 The pair wise linkage disequilibrium (LD) values of  $|D'|$  (upper) and  $r^2$  (lower)

| $r^2$     | $ D' $    |           |           |
|-----------|-----------|-----------|-----------|
|           | rs7069102 | rs2273773 | rs3818292 |
| rs7069102 |           | 0.95      | 0.87      |
| rs2273773 | 0.095     |           | 0.97      |
| rs3818292 | 0.082     | 0.92      |           |

Additional Table 2 Estimated SIRT1 haplotypes and frequencies in the Japanese population

|             | rs7069102 | rs2273773 | rs3818292 | Frequencies (%) |
|-------------|-----------|-----------|-----------|-----------------|
| Haplotype 1 | C         | T         | A         | 48.4            |
| Haplotype 2 | C         | C         | G         | 33.4            |
| Haplotype 3 | G         | T         | A         | 16.1            |
